# Supplementary material for: Impact of standard and long-lasting ivermectin formulations in cattle and buffalo on wild Anopheles survival on Sumba Island, Indonesia
Source: PubMed Central journal article supplement — Sci Rep. 2024 Nov 30;14:29770. doi: 10.1038/s41598-024-81743-x (PMC11608319; doi:10.1038/s41598-024-81743-x), 2024-11-30
Supplement: 41598_2024_81743_MOESM1_ESM.pdf [file 41598_2024_81743_MOESM1_ESM.pdf]

| Species | Formulation  | Parameter (median (min, max)) |                                  |                                               |                                                                                     |                                               |                                                                                     |                     |
|---------|--------------|-------------------------------|----------------------------------|-----------------------------------------------|-------------------------------------------------------------------------------------|-----------------------------------------------|-------------------------------------------------------------------------------------|---------------------|
|         |              | Dose (mg)                     | Dose ( $\mu\text{g}/\text{kg}$ ) | AUC<br>( $\text{ng}\cdot\text{h}/\text{mL}$ ) | Dose normalized AUC<br>( $\text{ng}\cdot\text{h}/\text{mL}/(\text{mg}/\text{kg})$ ) | $C_{\text{max}}$<br>( $\text{ng}/\text{mL}$ ) | Dose normalized $C_{\text{max}}$<br>( $\text{ng}/\text{mL}/(\text{mg}/\text{kg})$ ) | Half-life<br>(days) |
| Buffalo | Standard     | 35                            | 231.48                           | 1,327.01                                      | 5,462.99                                                                            | 13.25                                         | 54.53                                                                               | 5.29                |
|         |              | (30-60)                       | (219.78-262.01)                  | (1,207.60-1,510.24)                           | (5,186.09-6,695.39)                                                                 | (10.50-21.30)                                 | (44.23-94.43)                                                                       | (3.81-7.73)         |
|         | Long-lasting | 189                           | 724.91                           | 4,064.90                                      | 5,624.60                                                                            | 6.75                                          | 8.71                                                                                | 30.08               |
|         |              | (189-220.5)                   | (706.54-819.70)                  | (2,753.67-8,428.46)                           | (3,839.11-10,282.34)                                                                | (3.99-10.9)                                   | (5.56-14.88)                                                                        | (24.03-45.87)       |
| Cattle  | Standard     | 45                            | 205.61                           | 5,475.66                                      | 23,588.04                                                                           | 37.1                                          | 143.42                                                                              | 4.15                |
|         |              | (40-50)                       | (202.43-352.42)                  | (4,699.12-7,129.21)                           | (17,162.69-34,505.35)                                                               | (15.1-49.9)                                   | (74.59-243.89)                                                                      | (3.40-8.19)         |
|         | Long-lasting | 141.75                        | 757.71                           | 28,162.74                                     | 34,665.79                                                                           | 29.4                                          | 34.45                                                                               | 28.40               |
|         |              | (126-189)                     | (686.03-984.38)                  | (25,996.49-37,436.07)                         | (30,386.38-54,569.50)                                                               | (23.7-50.9)                                   | (29.72-74.20)                                                                       | (22.98-34.38)       |

Supplemental Table 1 depicts pharmacokinetic parameters of cattle and buffalo injected with standard and long-lasting ivermectin.

Parameters were presented as median (min, max). Administered doses were presented as dose in mg and dose per weight in  $\mu\text{g}/\text{kg}$ .

Pharmacokinetic parameters include area under the concentration-time curve (AUC), dose normalized AUC, maximum concentration ( $C_{\text{max}}$ ), dose normalized  $C_{\text{max}}$  and half-life.
