# Supplementary material for: Impact of standard and long-lasting ivermectin formulations in cattle and buffalo on wild Anopheles survival on Sumba Island, Indonesia
Source: PubMed Central journal article supplement — Sci Rep. 2024 Nov 30;14:29770. doi: 10.1038/s41598-024-81743-x (PMC11608319; doi:10.1038/s41598-024-81743-x), 2024-11-30
Supplement: 41598_2024_81743_MOESM3_ESM.pdf [file 41598_2024_81743_MOESM3_ESM.pdf]

Ivermectin-Susceptible *Anopheles*

| Buffalo    | Standard Ivermectin |                   |                   |                   |        |        |        |        |        |        |       |        |        |
|------------|---------------------|-------------------|-------------------|-------------------|--------|--------|--------|--------|--------|--------|-------|--------|--------|
| DPT        | P-D                 | 3/4               | 7/8               | 11/12             | 15/16  | 19/20  | 23/24  | 31/32  | 39/40  | 46/48  | 55/56 | 63/64  | 71/72  |
| Chi-Square | 1.60                | <b>89.92</b>      | <b>72.59</b>      | <b>21.37</b>      | 11.66  | 1.45   | 5.2    | 0.95   | 14.94  | 2.85   | 1.01  | 2.24   | 0.37   |
| P-value    | 0.2054              | <b>&lt;0.0001</b> | <b>&lt;0.0001</b> | <b>&lt;0.0001</b> | 0.0006 | 0.2293 | 0.0226 | 0.3301 | 0.0001 | 0.0916 | 0.316 | 0.1348 | 0.5422 |
| # Mosq     | 1,407               | 392               | 339               | 347               | 586    | 446    | 298    | 277    | 510    | 357    | 138   | 222    | 322    |

Ivermectin-Susceptible *Anopheles*

| Buffalo    | Long-Lasting Ivermectin |       |                   |                   |                   |                   |                   |                   |                   |                   |                   |               |                   |
|------------|-------------------------|-------|-------------------|-------------------|-------------------|-------------------|-------------------|-------------------|-------------------|-------------------|-------------------|---------------|-------------------|
| DPT        | P-D                     | 3/4   | 7/8               | 11/12             | 15/16             | 19/20             | 23/24             | 31/32             | 39/40             | 46/48             | 55/56             | 63/64         | 71/72             |
| Chi-Square | <b>9.14</b>             | 3.81  | <b>169.4</b>      | <b>129</b>        | <b>313.4</b>      | <b>78.52</b>      | <b>123.5</b>      | <b>95.05</b>      | <b>101.6</b>      | <b>95.92</b>      | <b>8.33</b>       | <b>12.93</b>  | <b>24.77</b>      |
| P-value    | <b>0.0025</b>           | 0.051 | <b>&lt;0.0001</b> | <b>0.0003</b> | <b>&lt;0.0001</b> |
| # Mosq     | 1,499                   | 274   | 325               | 262               | 642               | 425               | 354               | 300               | 376               | 202               | 120               | 185           | 280               |

Ivermectin-Tolerant *Anopheles*

| Buffalo    | Standard Ivermectin |                   |                   |               |         |        |        |        |       |        |        |        |        |
|------------|---------------------|-------------------|-------------------|---------------|---------|--------|--------|--------|-------|--------|--------|--------|--------|
| DPT        | P-D                 | 3/4               | 7/8               | 11/12         | 15/16   | 19/20  | 23/24  | 31/32  | 39/40 | 46/48  | 55/56  | 63/64  | 71/72  |
| Chi-Square | <b>15.27</b>        | <b>371</b>        | <b>69.22</b>      | <b>6.053</b>  | 18.77   | 0.37   | 0.87   | 13.97  | 1.63  | 1.54   | 2.22   | 0.00   | 2.43   |
| P-value    | <b>&lt;0.0001</b>   | <b>&lt;0.0001</b> | <b>&lt;0.0001</b> | <b>0.0139</b> | <0.0001 | 0.5447 | 0.3502 | 0.0002 | 0.202 | 0.2146 | 0.1367 | 0.9967 | 0.1194 |
| # Mosq     | 4,771               | 1,502             | 1,300             | 620           | 1,818   | 1,252  | 1,321  | 984    | 983   | 1,163  | 1,203  | 1,867  | 1,986  |

Ivermectin-Tolerant *Anopheles*

| Buffalo    | Long-Lasting Ivermectin |                   |                   |                   |                   |                   |                   |                   |                   |               |                   |        |               |
|------------|-------------------------|-------------------|-------------------|-------------------|-------------------|-------------------|-------------------|-------------------|-------------------|---------------|-------------------|--------|---------------|
| DPT        | P-D                     | 3/4               | 7/8               | 11/12             | 15/16             | 19/20             | 23/24             | 31/32             | 39/40             | 46/48         | 55/56             | 63/64  | 71/72         |
| Chi-Square | 1.82                    | <b>65.12</b>      | <b>267.1</b>      | <b>252.9</b>      | <b>604.3</b>      | <b>125.6</b>      | <b>175.4</b>      | <b>20.4</b>       | <b>27.54</b>      | <b>8.64</b>   | <b>25.02</b>      | 0.35   | <b>14.99</b>  |
| P-value    | 0.1773                  | <b>&lt;0.0001</b> | <b>0.0033</b> | <b>&lt;0.0001</b> | 0.5521 | <b>0.0001</b> |
| # Mosq     | 5,206                   | 1,337             | 1,288             | 1,201             | 2,025             | 1,716             | 1,740             | 991               | 1,160             | 1,176         | 1,507             | 1,831  | 2,336         |

Supplemental Table 3 presents the Mantel-Cox survival curve comparison of *Anopheles* (Susceptible or Tolerant) survival 7 days post blood meal when fed on control buffalo or ivermectin-treated buffalo (Standard or Long-Lasting) at each day post treatment (DPT) time collection. All mosquitoes captured pre-dose (P-D) were combined. Comparisons that have significantly reduced survival in the treated group compared to control are in bold. # Mosq is the total number of mosquitoes captured by the control and treatment buffalo at that timepoint.
