# Supplementary material for: Impact of standard and long-lasting ivermectin formulations in cattle and buffalo on wild Anopheles survival on Sumba Island, Indonesia
Source: PubMed Central journal article supplement — Sci Rep. 2024 Nov 30;14:29770. doi: 10.1038/s41598-024-81743-x (PMC11608319; doi:10.1038/s41598-024-81743-x), 2024-11-30
Supplement: 41598_2024_81743_MOESM4_ESM.pdf [file 41598_2024_81743_MOESM4_ESM.pdf]

| Comparison         | Total         |                   | <i>An. aconitus</i> |                   | <i>An. annularis</i> |                   | <i>An. barbirostris</i> |                   | <i>An. flavirostris</i> |               |
|--------------------|---------------|-------------------|---------------------|-------------------|----------------------|-------------------|-------------------------|-------------------|-------------------------|---------------|
|                    | Mean Diff.    | P-value           | Mean Diff.          | P-value           | Mean Diff.           | P-value           | Mean Diff.              | P-value           | Mean Diff.              | P-value       |
| Human vs. Cattle   | <b>-1.071</b> | <b>&lt;0.0001</b> | <b>-0.515</b>       | <b>&lt;0.0001</b> | <b>-0.633</b>        | <b>&lt;0.0001</b> | <b>-0.741</b>           | <b>&lt;0.0001</b> | -0.210                  | 0.0830        |
| Human vs. Buffalo  | <b>-1.306</b> | <b>&lt;0.0001</b> | <b>-0.575</b>       | <b>&lt;0.0001</b> | <b>-0.874</b>        | <b>&lt;0.0001</b> | <b>-1.054</b>           | <b>&lt;0.0001</b> | <b>-0.375</b>           | <b>0.0004</b> |
| Human vs. Horse    | <b>-0.835</b> | <b>&lt;0.0001</b> | -0.229              | 0.0800            | <b>-0.329</b>        | <b>0.0007</b>     | <b>-0.807</b>           | <b>&lt;0.0001</b> | -0.093                  | 0.7005        |
| Cattle vs. Buffalo | <b>-0.235</b> | <b>0.0151</b>     | -0.059              | 0.9199            | <b>-0.240</b>        | <b>0.0190</b>     | <b>-0.313</b>           | <b>0.0019</b>     | -0.165                  | 0.2366        |
| Cattle vs. Horse   | <b>0.236</b>  | <b>0.0150</b>     | <b>0.286</b>        | <b>0.0178</b>     | <b>0.304</b>         | <b>0.0019</b>     | -0.066                  | 0.8491            | 0.117                   | 0.5327        |
| Buffalo vs. Horse  | <b>0.471</b>  | <b>&lt;0.0001</b> | <b>0.346</b>        | <b>0.0030</b>     | <b>0.545</b>         | <b>&lt;0.0001</b> | <b>0.247</b>            | <b>0.0195</b>     | <b>0.282</b>            | <b>0.0105</b> |

  

| Comparison         | <i>An. kochi</i> |                   | <i>An. maculatus</i> |                   | <i>An. sundaicus</i> |               | <i>An. tessellatus</i> |                   | <i>An. vagus</i> |                   |
|--------------------|------------------|-------------------|----------------------|-------------------|----------------------|---------------|------------------------|-------------------|------------------|-------------------|
|                    | Mean Diff.       | P-value           | Mean Diff.           | P-value           | Mean Diff.           | P-value       | Mean Diff.             | P-value           | Mean Diff.       | P-value           |
| Human vs. Cattle   | <b>-0.801</b>    | <b>&lt;0.0001</b> | <b>-0.439</b>        | <b>&lt;0.0001</b> | <b>-0.114</b>        | <b>0.0240</b> | <b>-0.506</b>          | <b>&lt;0.0001</b> | <b>-1.108</b>    | <b>&lt;0.0001</b> |
| Human vs. Buffalo  | <b>-0.966</b>    | <b>&lt;0.0001</b> | <b>-0.654</b>        | <b>&lt;0.0001</b> | <b>-0.176</b>        | <b>0.0002</b> | <b>-0.710</b>          | <b>&lt;0.0001</b> | <b>-1.305</b>    | <b>&lt;0.0001</b> |
| Human vs. Horse    | <b>-0.664</b>    | <b>&lt;0.0001</b> | <b>-0.386</b>        | <b>&lt;0.0001</b> | <b>-0.092</b>        | <b>0.0947</b> | <b>-0.441</b>          | <b>&lt;0.0001</b> | <b>-0.883</b>    | <b>&lt;0.0001</b> |
| Cattle vs. Buffalo | -0.165           | 0.0781            | <b>-0.216</b>        | <b>0.0343</b>     | -0.062               | 0.3889        | -0.204                 | 0.0643            | -0.196           | 0.2306            |
| Cattle vs. Horse   | 0.137            | 0.1860            | 0.053                | 0.9005            | 0.022                | 0.9385        | 0.064                  | 0.8519            | 0.226            | 0.1342            |
| Buffalo vs. Horse  | <b>0.302</b>     | <b>0.0002</b>     | <b>0.269</b>         | <b>0.0053</b>     | 0.084                | 0.1446        | <b>0.268</b>           | <b>0.0081</b>     | <b>0.422</b>     | <b>0.0008</b>     |

Supplemental Table 4 represents the Post-hoc Tukey's comparison of *Anopheles* captured from various hosts (Human, Cattle, Buffalo, Horse). Significant comparisons are in bold. Mean Difference (Diff.) informs whether there were fewer (negative) or more (positive) mosquitoes caught per host comparison.
